# Supplementary material
Source: PubMed Central journal article supplement (PMC4451208)
Supplement: NIHMS689824-supplement-Supplemental_Table_1.pdf [file NIHMS689824-supplement-Supplemental_Table_1.pdf]

**Supplemental Table 1: VAC and IVAC bivariate risk factor analysis over 3-day and 7-day periods prior to VAC onset**

|                                                                               | VAC Cases        | Controls         | OR (95% CI)             | p-value     | IVAC Cases         | Controls           | OR (95% CI)            | p-value     |
|-------------------------------------------------------------------------------|------------------|------------------|-------------------------|-------------|--------------------|--------------------|------------------------|-------------|
| <b>Classic VAP Bundle: mean % adherence over 3 days prior to VAC (SD)</b>     |                  |                  |                         |             |                    |                    |                        |             |
| Head of bed elevation                                                         | 77 (28)          | 74 (32)          | 1.01 (1.00-1.02)        | NS          | 73 (34)            | 75 (35)            | 1.00 (0.98-1.01)       | NS          |
| Oral care with chlorhexidine                                                  | 77 (26)          | 82 (30)          | 1.01 (1.00-1.02)        | NS          | 75 (29)            | 75 (33)            | 1.00 (0.98-1.02)       | NS          |
| Deep vein thrombosis prophylaxis                                              | 80 (27)          | 74 (31)          | 1.01 (1.00-1.02)        | NS          | 77 (32)            | 77 (32)            | 1.00 (0.98-1.02)       | NS          |
| Stress ulcer prophylaxis                                                      | <b>85 (24)</b>   | <b>79 (28)</b>   | <b>1.01 (1.00-1.02)</b> | <b>0.08</b> | 83 (28)            | 80 (29)            | 1.01 (0.98-1.02)       | NS          |
| Sedative interruption                                                         | 47 (38)          | 45 (35)          | 1.00 (0.99-1.01)        | NS          | 44 (39)            | 49 (37)            | 1.00 (0.98-1.01)       | NS          |
| Spontaneous breathing trial                                                   | 22 (31)          | 21 (30)          | 1.00 (0.99-1.01)        | NS          | 21 (30)            | 22 (31)            | 1.00 (0.98-1.02)       | NS          |
| Measure the Rapid Spontaneous Breathing Index                                 | <b>60 (38)</b>   | <b>51 (40)</b>   | <b>1.01 (1.00-1.02)</b> | <b>0.08</b> | 54 (41)            | 45 (39)            | 1.01 (0.99-1.02)       | NS          |
| <b>Classic VAP Bundle: mean % adherence over 7 days prior to VAC (SD)</b>     |                  |                  |                         |             |                    |                    |                        |             |
| Head of bed elevation                                                         | 73 (27)          | 71 (29)          | 1.00 (0.99-1.02)        | NS          | 67 (31)            | 70 (33)            | 1.00 (0.98-1.01)       | NS          |
| Oral care with chlorhexidine                                                  | 73 (25)          | 70 (27)          | 1.01 (0.99-1.02)        | NS          | 70 (26)            | 73 (31)            | 0.99 (0.97-1.01)       | NS          |
| Deep vein thrombosis prophylaxis                                              | 75 (27)          | 73 (29)          | 1.00 (0.99-1.01)        | NS          | 72 (31)            | 76 (31)            | 1.00 (0.98-1.01)       | NS          |
| Stress ulcer prophylaxis                                                      | 80 (24)          | 78 (26)          | 1.00 (0.99-1.01)        | NS          | 79 (28)            | 79 (27)            | 1.00 (0.98-1.02)       | NS          |
| Sedative interruption                                                         | 44 (35)          | 44 (34)          | 1.00 (0.99-1.01)        | NS          | 40 (36)            | 49 (36)            | 0.99 (0.97-1.00)       | NS          |
| Spontaneous breathing trial                                                   | 19 (26)          | 20 (26)          | 1.00 (0.99-1.01)        | NS          | 17 (23)            | 20 (28)            | 1.00 (0.98-1.01)       | NS          |
| Measure the Rapid Spontaneous Breathing Index                                 | 55 (36)          | 50 (38)          | 1.00 (1.00-1.01)        | NS          | 49 (37)            | 47 (37)            | 1.00 (0.99-1.02)       | NS          |
| Mean RSBI over 3 days prior to VAC                                            | 102 (76)         | 110 (85)         | 1.00 (0.99-1.00)        | NS          | 105 (99)           | 92 (82)            | 1.00 (0.99-1.01)       | NS          |
| Mean RSBI over 7 days prior to VAC                                            | 103 (75)         | 107 (70)         | 1.00 (0.99-1.00)        | NS          | 107 (97)           | 101 (80)           | 1.00 (0.99-1.01)       | NS          |
| <b>Nutrition over 3 days prior to VAC (%)</b>                                 |                  |                  |                         |             |                    |                    |                        |             |
| Nothing by mouth 100% of the time                                             | 36 (33%)         | 36 (33%)         | 1.00 (0.49-2.06)        | NS          | 10 (26%)           | 11 (29%)           | 0.86 (0.28-2.58)       | NS          |
| Tube feeding – any exposure                                                   | 59 (54%)         | 68 (62%)         | 0.64 (0.34-1.19)        | NS          | 26 (68%)           | 26 (68%)           | 1.00 (0.34-2.92)       | NS          |
| Parenteral nutrition – any exposure                                           | 15 (14%)         | 11 (10%)         | 1.50 (0.62-3.83)        | NS          | 2 (5.3%)           | 3 (7.9%)           | 0.67 (0.09-4.02)       | NS          |
| <b>Nutrition over 7 days prior to VAC (%)</b>                                 |                  |                  |                         |             |                    |                    |                        |             |
| Nothing by mouth 100% of the time                                             | 36 (33%)         | 36 (33%)         | 1.00 (0.49-2.06)        | NS          | 10 (26%)           | 11 (29%)           | 0.86 (0.28-2.58)       | NS          |
| Tube feeding – any exposure                                                   | 60 (55%)         | 69 (63%)         | 0.64 (0.34-1.19)        | NS          | 26 (68%)           | 26 (68%)           | 1.00 (0.34-2.92)       | NS          |
| Parenteral Nutrition – any exposure                                           | 15 (14%)         | 13 (12%)         | 1.20 (0.52-2.82)        | NS          | 2 (5.3%)           | 5 (13%)            | 0.40 (0.06-1.86)       | NS          |
| <b>Blood products: mean units over 3 days (SD)</b>                            |                  |                  |                         |             |                    |                    |                        |             |
| Red blood cells                                                               | 0.63 (1.3)       | 0.56 (1.6)       | 1.04 (0.85-1.30)        | NS          | 0.7 (1.5)          | 0.7 (2.3)          | 1.01 (0.75-1.36)       | NS          |
| Fresh frozen plasma                                                           | 0.44 (1.3)       | 0.40 (1.4)       | 1.03 (0.81-1.31)        | NS          | 0.5 (1.3)          | 0.7 (2.1)          | 0.92 (0.61-1.28)       | NS          |
| Platelets                                                                     | 0.13 (0.4)       | 0.15 (0.6)       | 0.92 (0.50-1.64)        | NS          | 0.1 (0.3)          | 0.3 (1.0)          | 0.70 (0.20-1.47)       | NS          |
| <b>Blood products: mean units over 7 days (SD)</b>                            |                  |                  |                         |             |                    |                    |                        |             |
| Red blood cells                                                               | 0.68 (1.3)       | 0.56 (1.3)       | 1.08 (0.87-1.37)        | NS          | 0.8 (1.5)          | 0.7 (1.9)          | 1.01 (0.74-1.40)       | NS          |
| Fresh frozen plasma                                                           | 0.55 (1.4)       | 0.43 (1.2)       | 1.10 (0.86-1.45)        | NS          | 0.7 (1.4)          | 0.8 (1.8)          | 0.95 (0.63-1.38)       | NS          |
| Platelets                                                                     | 0.14 (0.37)      | 0.16 (0.61)      | 0.93 (0.47-1.75)        | NS          | 0.2 (0.3)          | 0.3 (1.0)          | 0.64 (0.14-1.43)       | NS          |
| <b>Sedative medications: mean total dose over 7 days (SD)</b>                 |                  |                  |                         |             |                    |                    |                        |             |
| Total sedative (propofol + benzodiazepines) – mg midazolam equivalents/kg     | <b>4.7 (5.5)</b> | <b>5.9 (6.7)</b> | <b>0.96 (0.91-1.01)</b> | <b>0.10</b> | 6.1 (6.8)          | 7.0 (7.4)          | 0.98 (0.91 -1.05)      | NS          |
| Total Benzodiazepine – mg midazolam equivalents/kg                            | 1.0 (1.2)        | 1.0 (1.5)        | 1.00 (0.85-1.18)        | NS          | 0.9 (1.1)          | 0.9 (1.2)          | 1.01 (0.67-1.53)       | NS          |
| Propofol – mg midazolam equivalents/kg                                        | 3.7 (5.2)        | 4.9 (6.6)        | 0.96 (0.91-1.01)        | NS          | 5.2 (6.8)          | 6.1 (7.5)          | 0.98 (0.91-1.05)       | NS          |
| Total sedative (propofol + benzodiazepines) – mg midazolam equivalents/kg/day | 1.1 (1.3)        | 1.2 (1.3)        | 0.68 (0.71-1.14)        | NS          | 1.4 (1.6)          | 1.4 (1.3)          | 1.02 (0.73-1.44)       | NS          |
| Total Benzodiazepine – mg midazolam equivalents/kg/day                        | 0.2 (0.6)        | 0.2 (0.3)        | 1.03 (0.51-2.09)        | NS          | 0.2 (0.3)          | 0.2 (0.2)          | 1.45 (0.19-13)         | NS          |
| Propofol – mg midazolam equivalents/kg/day                                    | 0.9 (1.2)        | 1.0 (1.3)        | 0.91 (0.71-1.13)        | NS          | 1.3 (1.6)          | 1.2 (1.4)          | 1.01 (0.73-1.39)       | NS          |
| Total opioid – 100 mcg fentanyl equivalents/kg                                | 0.66 (0.95)      | 0.62 (0.89)      | 1.06 (0.77-1.50)        | NS          | <b>0.67 (0.64)</b> | <b>0.49 (0.54)</b> | <b>2.64 (0.90-9.6)</b> | <b>0.08</b> |
| Total fentanyl – 100 mcg fentanyl/kg                                          | 0.54 (0.63)      | 0.48 (0.57)      | 1.23 (0.77-2.04)        | NS          | 0.63 (0.63)        | 0.48 (0.54)        | 2.42 (0.80-8.9)        | NS          |
| Total morphine – mcg fentanyl equivalents/kg                                  | 0.2 (1.2)        | 0.4 (3.9)        | 0.97 (0.81-1.07)        | NS          | 0.2 (0.6)          | 0.0 (0.2)          | 4.24 (0.72-610)        | NS          |
| Total opioid – 100 mcg fentanyl equivalents/kg/day                            | 0.13 (0.15)      | 0.12 (0.15)      | 1.30 (0.19-9.5)         | NS          | 0.14 (0.13)        | 0.10 (0.10)        | 54 (0.44-1.7E4)        | NS          |

|                                                  |                  |                  |                         |              |                  |                  |                                                  |             |
|--------------------------------------------------|------------------|------------------|-------------------------|--------------|------------------|------------------|--------------------------------------------------|-------------|
| Total fentanyl – mcg fentanyl/kg/day             | 0.11 (0.12)      | 0.10 (0.11)      | 2.65 (0.21-1.04)        | NS           | 0.13 (0.13)      | 0.10 (0.10)      | 36 (0.29-1.1E4)                                  | NS          |
| Total morphine – mcg fentanyl equivalents/kg/day | 0.0 (0.2)        | 0.1 (0.6)        | 0.82 (0.25-1.63)        | NS           | 0.0 (0.1)        | 0.0 (0.0)        | 3.7x10 <sup>4</sup> (0.19-2.9x10 <sup>17</sup> ) | NS          |
| Dexmedetomidine – mg/kg                          | 0.3 (1.5)        | 0.7 (4.6)        | 0.95 (0.82-1.04)        | NS           | 0.1 (1.3)        | 1.2 (7.1)        | 0.95 (0.68-1.05)                                 | NS          |
| Dexmedetomidine – mcg/kg/day                     | 0.1 (0.6)        | 0.1 (0.7)        | 0.98 (0.62-1.53)        | NS           | 0.0 (0.2)        | 0.2 (1.0)        | 0.69 (0.06-1.43)                                 | NS          |
| Cisatracurium – mg/kg                            | 0.3 (1.3)        | 0.4 (1.4)        | 0.98 (0.80-1.19)        | NS           | 0.6 (1.9)        | 0.5 (1.9)        | 1.02 (0.79-1.35)                                 | NS          |
| Cisatracurium – mg/kg/day                        | 0.1 (0.3)        | 0.1 (0.3)        | 0.95 (0.37-2.38)        | NS           | 0.1 (0.5)        | 0.1 (0.3)        | 1.65 (0.46-8.99)                                 | NS          |
| Daily minimum RASS: 3-day mean (SD)              | -2.8 (1.5)       | -2.7 (1.5)       | 0.93 (0.70-1.22)        | NS           | -3.1 (1.3)       | -3.1 (1.3)       | 0.93 (0.60-1.43)                                 | NS          |
| Daily minimum RASS: 7-day mean (SD)              | -2.8 (1.4)       | -2.6 (1.7)       | 0.85 (0.64-1.08)        | NS           | -3.1 (1.2)       | -2.9 (1.3)       | 0.75 (0.44-1.19)                                 | NS          |
| <b>Fluid balance: 3-day mean/day (SD)</b>        |                  |                  |                         |              |                  |                  |                                                  |             |
| Ins – L                                          | <b>4.9 (3.7)</b> | <b>3.8 (2.6)</b> | <b>1.20 (1.05-1.41)</b> | <b>0.003</b> | 4.7 (3.8)        | 4.3 (3.1)        | 1.07 (0.90-1.31)                                 | NS          |
| Outs – L                                         | 2.5 (2.1)        | 2.5 (1.4)        | 1.01 (0.85-1.21)        | 0.89         | <b>2.4 (1.5)</b> | <b>2.8 (1.5)</b> | <b>0.66 (0.36-1.07)</b>                          | <b>0.10</b> |
| Net balance – L                                  | <b>2.4 (3.4)</b> | <b>1.5 (2.3)</b> | <b>1.20 (1.06-1.40)</b> | <b>0.004</b> | 2.4 (3.8)        | 1.6 (2.5)        | 1.13 (0.95-1.43)                                 | 0.18        |
| <b>Fluid balance: 7-day mean/day (SD)</b>        |                  |                  |                         |              |                  |                  |                                                  |             |
| Ins – L                                          | <b>4.8 (3.5)</b> | <b>3.8 (2.5)</b> | <b>1.19 (1.05-1.38)</b> | <b>0.004</b> | 4.7 (3.8)        | 4.1 (3.0)        | 1.08 (0.92-1.31)                                 | NS          |
| Outs – L                                         | 2.4 (1.6)        | 2.3 (1.3)        | 1.07 (0.87-1.34)        | NS           | 2.4 (1.4)        | 2.6 (1.4)        | 0.79 (0.46-1.25)                                 | NS          |
| Net balance – L                                  | <b>2.4 (3.3)</b> | <b>1.6 (2.1)</b> | <b>1.16 (1.03-1.35)</b> | <b>0.015</b> | 2.3 (3.7)        | 1.6 (2.3)        | 1.10 (0.93-1.36)                                 | NS          |
| <b>Ventilator: 7-day mean (SD)</b>               |                  |                  |                         |              |                  |                  |                                                  |             |
| Minimum tidal volume – L/kg                      | 5.3 (1.6)        | 5.1 (1.4)        | 1.12 (0.91-1.39)        | NS           | <b>5.5 (1.3)</b> | <b>5.1 (1.4)</b> | <b>1.51 (0.95-2.59)</b>                          | <b>0.08</b> |
| Maximum tidal volume – L/kg                      | 7.7 (2.4)        | 7.6 (2.4)        | 1.01 (0.89-1.15)        | NS           | 8.0 (1.9)        | 7.5 (2.3)        | 1.14 (0.89-1.48)                                 | NS          |
| % days on mandatory vent modes at min TV         | <b>62 (40)</b>   | <b>54 (38)</b>   | <b>1.01 (1.00-1.02)</b> | <b>0.05</b>  | 61 (37)          | 54 (37)          | 1.01 (0.99-1.02)                                 | NS          |
| % days on mandatory vent modes at max TV         | <b>54 (41)</b>   | <b>42 (37)</b>   | <b>1.01 (1.00-1.02)</b> | <b>0.007</b> | 52 (37)          | 44 (37)          | 1.01 (0.99-1.02)                                 | NS          |
| Mandatory vent modes 100% of days at min TV      | <b>48 (44)</b>   | <b>35 (32)</b>   | <b>2.00 (1.05-4.02)</b> | <b>0.04</b>  | 13 (34)          | 10 (26)          | 1.50 (0.54-4.47)                                 | NS          |
| Mandatory vent modes 100% of days at max TV      | <b>40 (36)</b>   | <b>21 (19)</b>   | <b>2.73 (1.41-5.69)</b> | <b>0.003</b> | 10 (26)          | 7 (18)           | 1.60 (0.53-5.29)                                 | NS          |

**Abbreviations:** NS – non-significant, RASS – Richmond Agitation and Sedation Scale, RSBI – rapid shallow breathing index, SD – standard deviation, TV – tidal volume, VAP – ventilator-associated pneumonia
